# Supplementary material
Source: publisher site journal article supplement (https://www.dovepress.com/article/457054)
Supplement: Supplementary file 1 [file get_supplementary_file.php]

| Supplementary Table 1 Characteristics of the American patients. | |
| --- | --- |
| Variable | Total (N=16583797) |
| Age (mean (SD)) | 64.45 (0.41) |
| Sex, n (%) |  |
| Female | 7299430 (44.0) |
| Male | 9284367 (56.0) |
| BMI (mean (SD)) | 29.73 (0.21) |
| Race, n (%) |  |
| Non-Hispanic White | 12666037 (76.4) |
| Other | 3917760 (23.6) |
| ePWV (mean (SD)) | 10.14 (0.06) |
| Congestive heart failure, n (%) | 3306955 (19.9) |
| Stroke, n (%) | 6130261 (37.0) |
| Cancer, n (%) | 3309176 (20.0) |
| COPD, n (%) | 2289893 (13.8) |
| TC (mean (SD)) | 4.81 (0.03) |
| LDL-C (mean (SD)) | 2.72 (0.03) |
| HDL-C (mean (SD)) | 1.32 (0.01) |
| WBC (mean (SD)) | 7.19 (0.07) |
| CRP (mean (SD)) | 0.55 (0.03) |
| SMuRF |  |
| ≥1 SMuRF | 15811897 (95.3) |
| SMuRF-less | 771900 (4.7) |
| BMI, body mass index; ePWV, estimated pulse wave velocity; COPD, chronic obstructive pulmonary disease; TC, total cholesterol; LDL-C, low-density lipoprotein-cholesterol; HDL-C, high-density lipoprotein-cholesterol; WBC, white blood cell; CRP, C-reactive protein; SMuRF, standard modifiable risk factor. | |

| Supplementary Supplementary Table 2 The associations between ePWV and characteristics of the American patients in the ≥1 SMuRF and SMuRF-less cohort. | | | | | | | | | | |
| --- | --- | --- | --- | --- | --- | --- | --- | --- | --- | --- |
| Variable | Total (N=15811897) | ≥1 SMuRF | | | P value | Total (N=771900) | SMuRF-less | | | P value |
| Q1 (N=6411305) | Q2 (N=5151895) | Q3 (N=4248697) |  | Q1 (N=338209) | Q2 (N=281274) | Q3 (N=152416) |  |
| Age (mean (SD)) | 64.95 (0.4) | 53.68 (0.5) | 68.08 (0.36) | 78.16 (0.21) | **< 0.001** | 54.25 (2.4) | 36.83 (2.3) | 61.18 (1.95) | 80.12 (0.74) | **< 0.001** |
| Sex, n (%) |  |  |  |  | **< 0.001** |  |  |  |  | **0.031** |
| Female | 6892559 (43.6) | 2869540 (44.8) | 1858340 (36.1) | 2164679 (51) |  | 406871 (52.7) | 249737 (73.8) | 114483 (40.7) | 42650 (28) |  |
| Male | 8919338 (56.4) | 3541765 (55.2) | 3293555 (63.9) | 2084018 (49) |  | 365029 (47.3) | 88472 (26.2) | 166791 (59.3) | 109766 (72) |  |
| BMI (mean (SD)) | 29.81 (0.22) | 30.54 (0.39) | 30.6 (0.4) | 27.68 (0.24) | **< 0.001** | 28.09 (0.87) | 27.93 (1.05) | 30.29 (1.88) | 24.11 (1.03) | **0.046** |
| Race, n (%) |  |  |  |  | **< 0.001** |  |  |  |  | 0.225 |
| Non-Hispanic White | 12071867 (76.3) | 4569494 (71.3) | 3949236 (76.7) | 3553137 (83.6) |  | 594170 (77) | 231475 (68.4) | 231071 (82.2) | 131624 (86.4) |  |
| Other | 3740030 (23.6) | 1841812 (28.7) | 1202659 (23.3) | 695559 (16.4) |  | 177730 (23) | 106734 (31.6) | 50203 (17.9) | 20793 (13.6) |  |
| Congestive heart failure, n (%) | 3193907 (20.2) | 1190107 (18.8) | 1047462 (20.5) | 956338 (22.8) | 0.398 | 113048 (14.7) | 20275 (6) | 76439 (27.2) | 16334 (10.7) | 0.099 |
| Stroke, n (%) | 5762088 (36.4) | 2371432 (37) | 1667913 (32.4) | 1722743 (40.6) | 0.065 | 368173 (47.7) | 164781 (48.7) | 141869 (50.4) | 61523 (40.4) | 0.806 |
| Cancer, n (%) | 3169468 (20) | 771752 (12.1) | 1007741 (19.6) | 1389975 (32.7) | **< 0.001** | 139708 (18.1) | 45725 (13.5) | 54188 (19.3) | 39795 (26.1) | 0.652 |
| COPD, n (%) | 2231794 (14.1) | 951934 (14.8) | 839177 (16.3) | 440683 (10.4) | 0.072 | 58099 (7.5) | 0 (0) | 23711 (8.4) | 34388 (22.6) | 0.109 |
| TC (mean (SD)) | 4.82 (0.04) | 4.86 (0.06) | 4.81 (0.06) | 4.77 (0.06) | 0.604 | 4.62 (0.06) | 4.57 (0.11) | 4.66 (0.09) | 4.66 (0.07) | 0.763 |
| LDL-C (mean (SD)) | 2.73 (0.03) | 2.77 (0.05) | 2.71 (0.05) | 2.68 (0.05) | 0.390 | 2.66 (0.07) | 2.61 (0.13) | 2.72 (0.11) | 2.65 (0.09) | 0.771 |
| HDL-C (mean (SD)) | 1.31 (0.01) | 1.25 (0.02) | 1.34 (0.02) | 1.38 (0.02) | **< 0.001** | 1.43 (0.07) | 1.47 (0.12) | 1.37 (0.12) | 1.43 (0.08) | 0.835 |
| WBC (mean (SD)) | 7.23 (0.07) | 7.32 (0.1) | 7.06 (0.13) | 7.28 (0.15) | 0.297 | 6.41 (0.22) | 6.36 (0.29) | 6.01 (0.41) | 7.23 (0.41) | 0.163 |
| CRP (mean (SD)) | 0.54 (0.03) | 0.58 (0.06) | 0.53 (0.06) | 0.49 (0.04) | 0.381 | 0.78 (0.2) | 0.63 (0.2) | 0.84 (0.36) | 1 (0.61) | 0.790 |
| BMI, body mass index; ePWV, estimated pulse wave velocity; COPD, chronic obstructive pulmonary disease; TC, total cholesterol; LDL-C, low-density lipoprotein-cholesterol; HDL-C, high-density lipoprotein-cholesterol; WBC, white blood cell; CRP, C-reactive protein; SMuRF, standard modifiable risk factor. Bold values represent significant p values. | | | | | | | | | | |
